# Supplementary material for: Quantitative assessment of maternal biomarkers related to one-carbon metabolism and neural tube defects
Source: PubMed Central journal article supplement (PMC4345334; doi:10.1038/srep08510), 2015-03-02
Supplement: srep08510-s1.pdf [file srep08510-s1.pdf]

**Quantitative Assessment of Maternal Biomarkers related to One-Carbon  
Metabolism and Neural Tube Defects**

Ke-Fu Tang, Yao-Long Li, Hong-Yan Wang \*

\*Corresponding author

**Supplementary Figure S1**

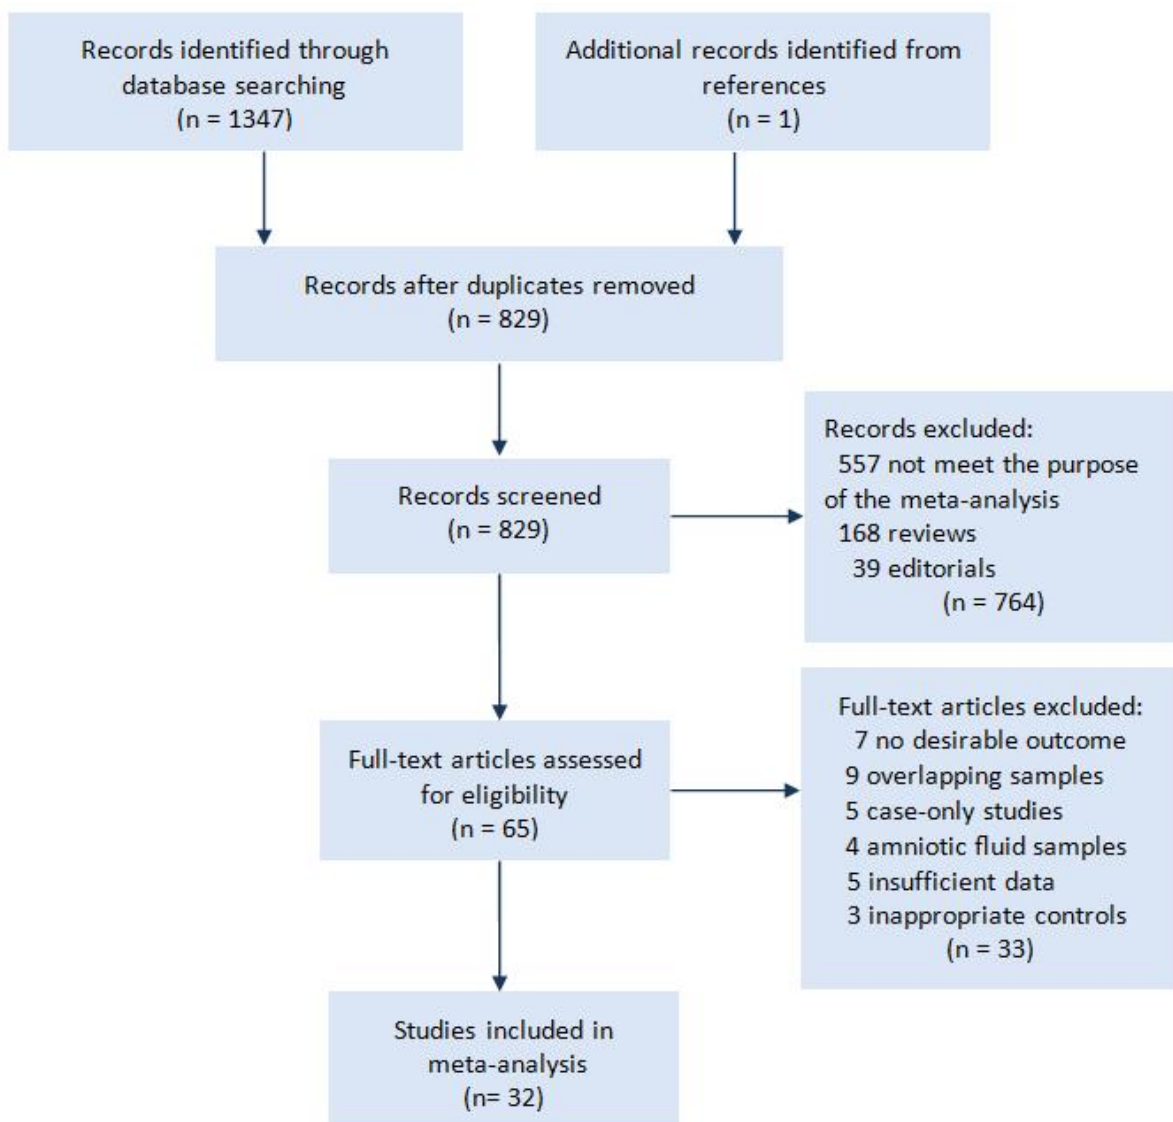

**Supplementary Figure S1.** Flow chart of literature search for studies examining Maternal Biomarkers related to One-Carbon Metabolism and Neural Tube Defects

## Supplementary Figure S2

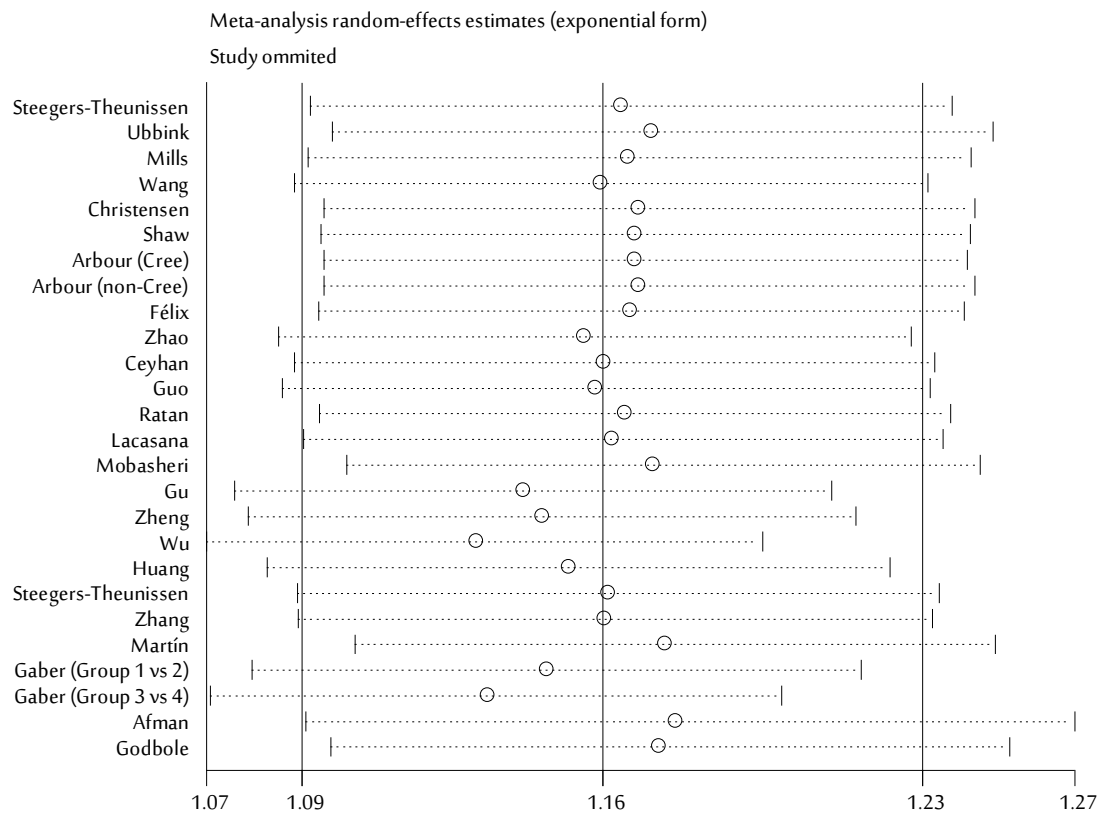

**Supplementary Figure S2.** Sensitivity analysis on the RoM of maternal homocysteine level in the NTDs-affected mothers compared with control mothers

### Supplementary Figure S3

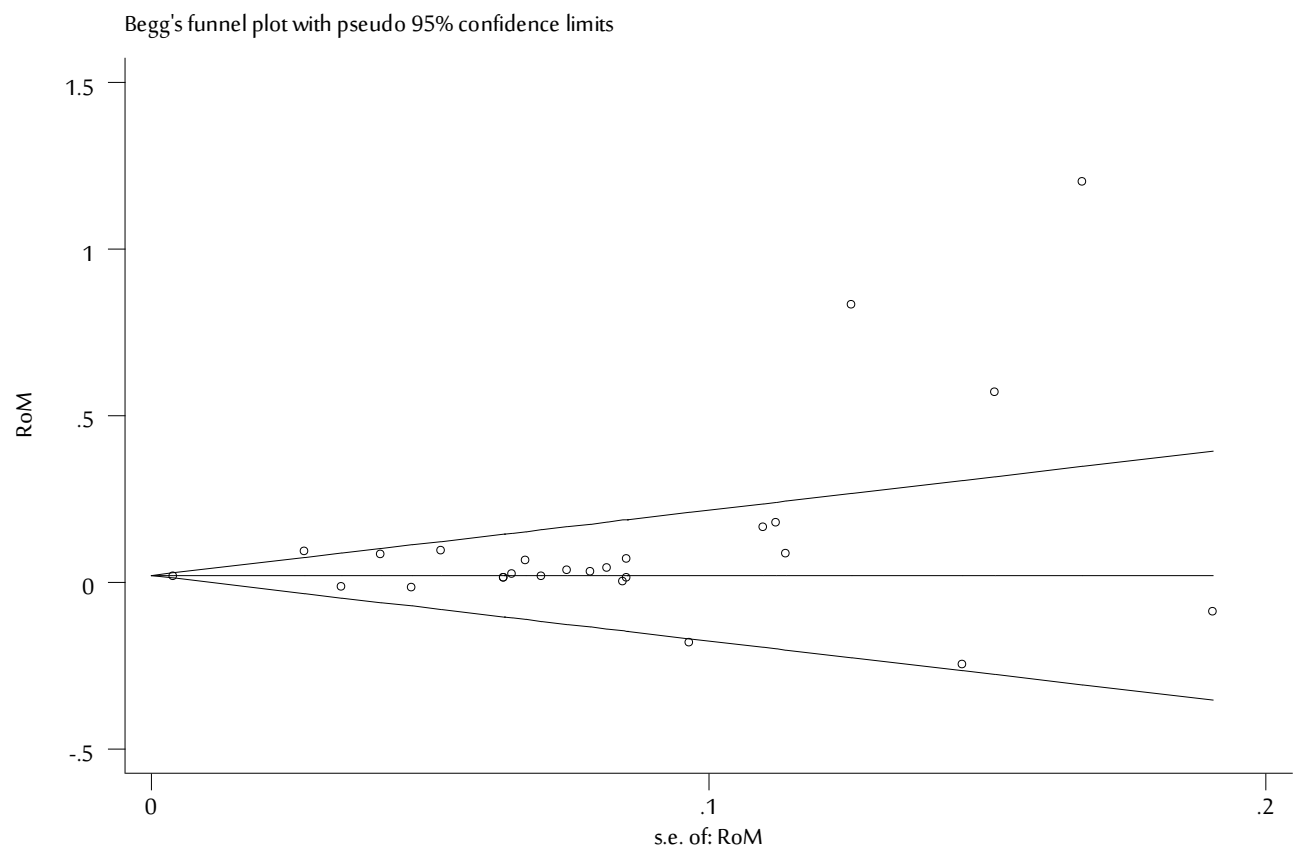

**Supplementary Figure S3.** Publication bias in studies of maternal homocysteine level in the NTDs-affected mothers compared with control mothers by Funnel plot.

### Supplementary Figure S4

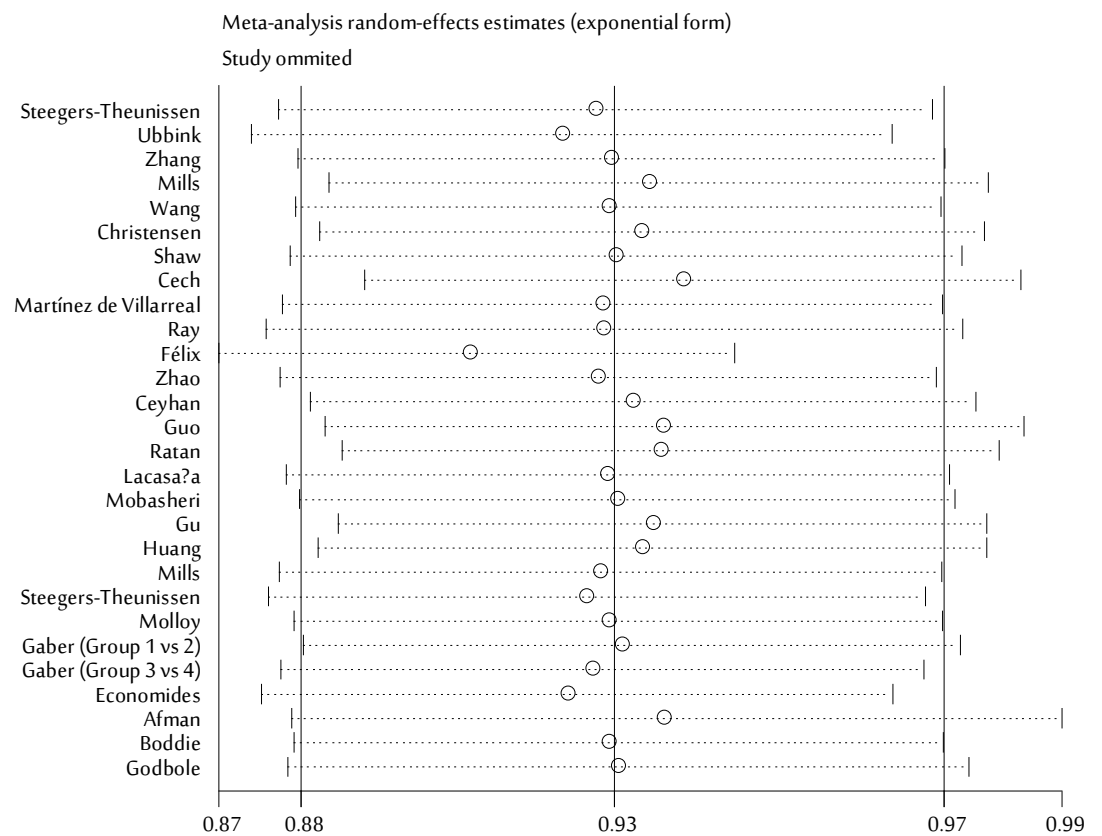

**Supplementary Figure S4.** Sensitivity analysis on the RoM of maternal folate level in the NTDs-affected mothers compared with control mothers

**Supplementary Figure S5**

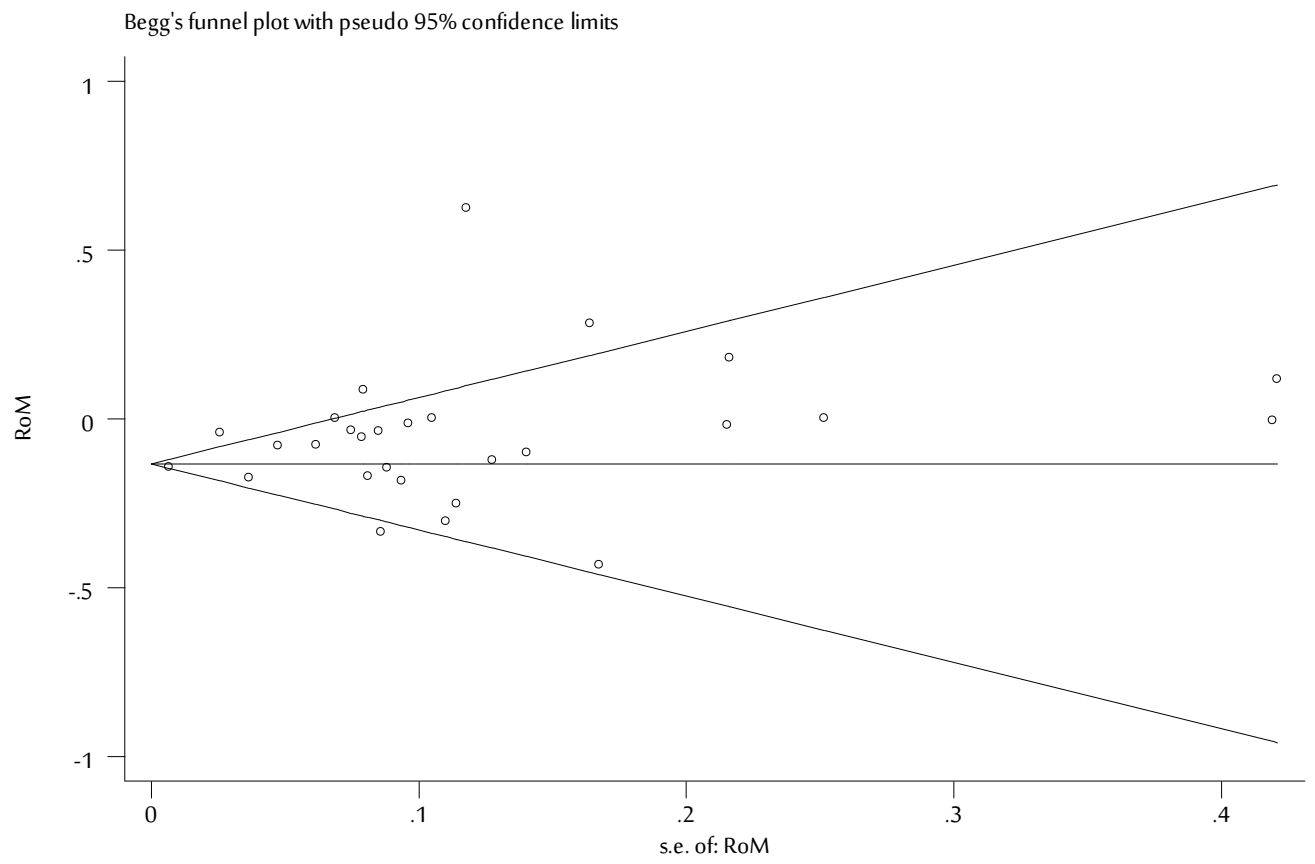

**Supplementary Figure S5.** Publication bias in studies of maternal folate level in the NTDs-affected mothers compared with control mothers by Funnel plot.

### Supplementary Figure S6

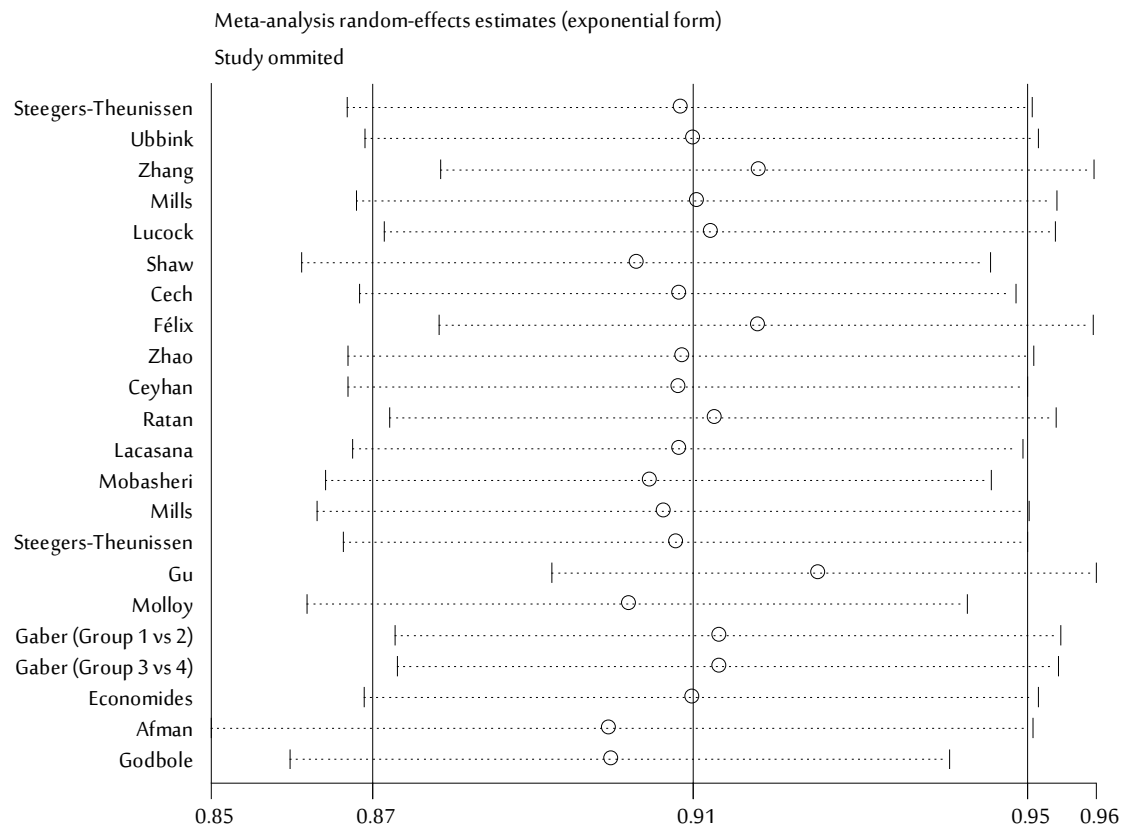

**Supplementary Figure S6.** Sensitivity analysis on the RoM of maternal vitamin B12 level in the NTDs-affected mothers compared with control mothers

**Supplementary Figure S7**

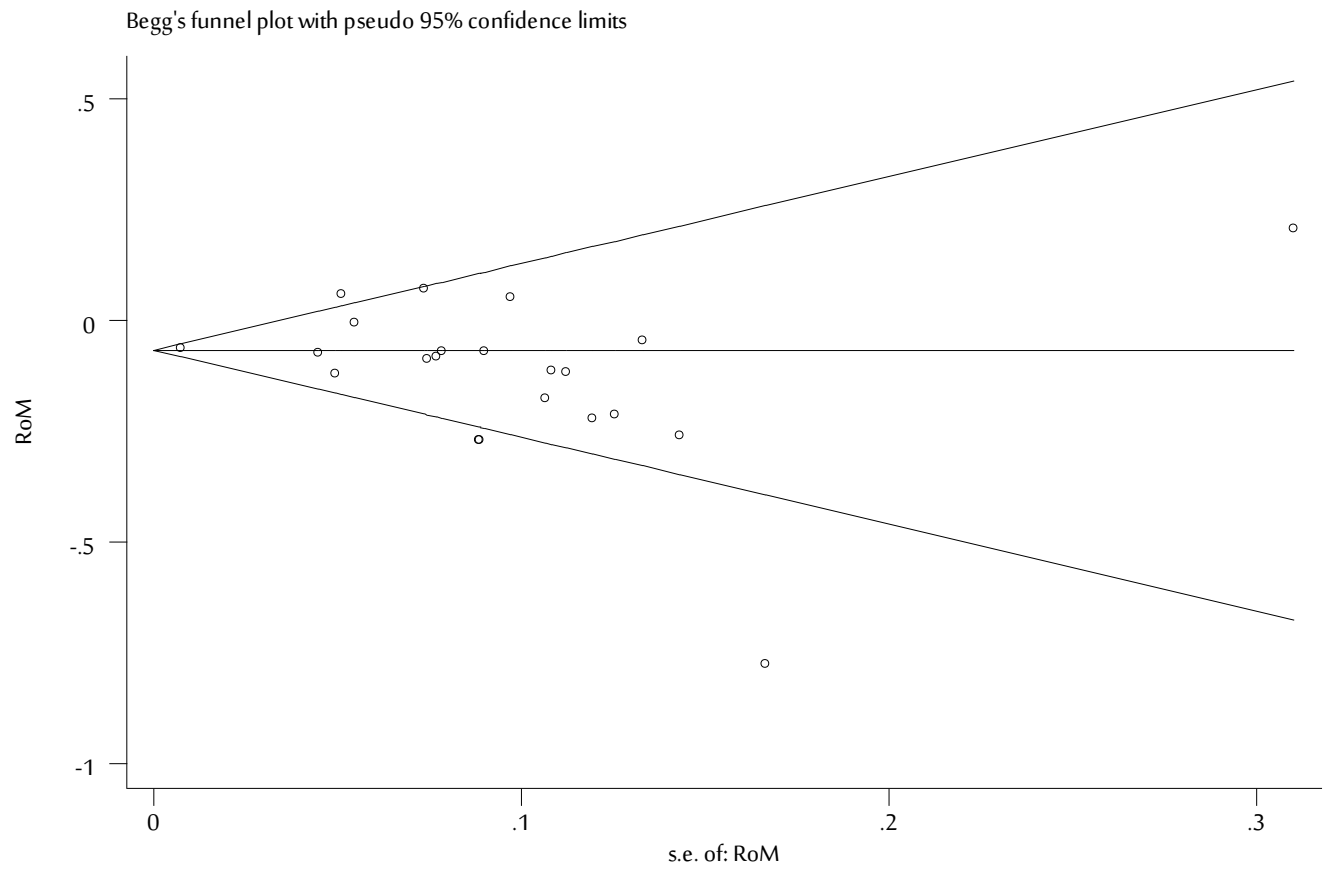

**Supplementary Figure S7.** Publication bias in studies of maternal vitamin B12 level in the NTDs-affected mothers compared with control mothers by Funnel plot.



### Supplementary Figure S8

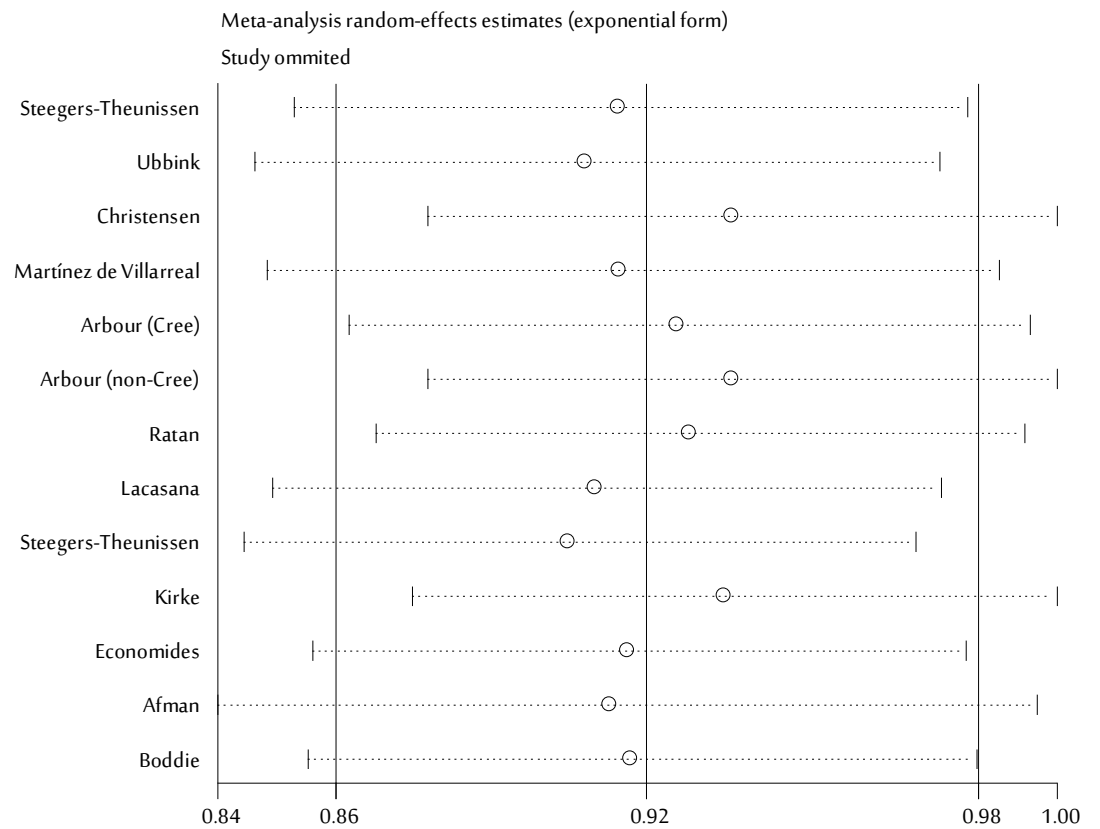

**Supplementary Figure S8.** Sensitivity analysis on the RoM of maternal red blood cell folate level in the NTDs-affected mothers compared with control mothers

**Supplementary Figure S9**

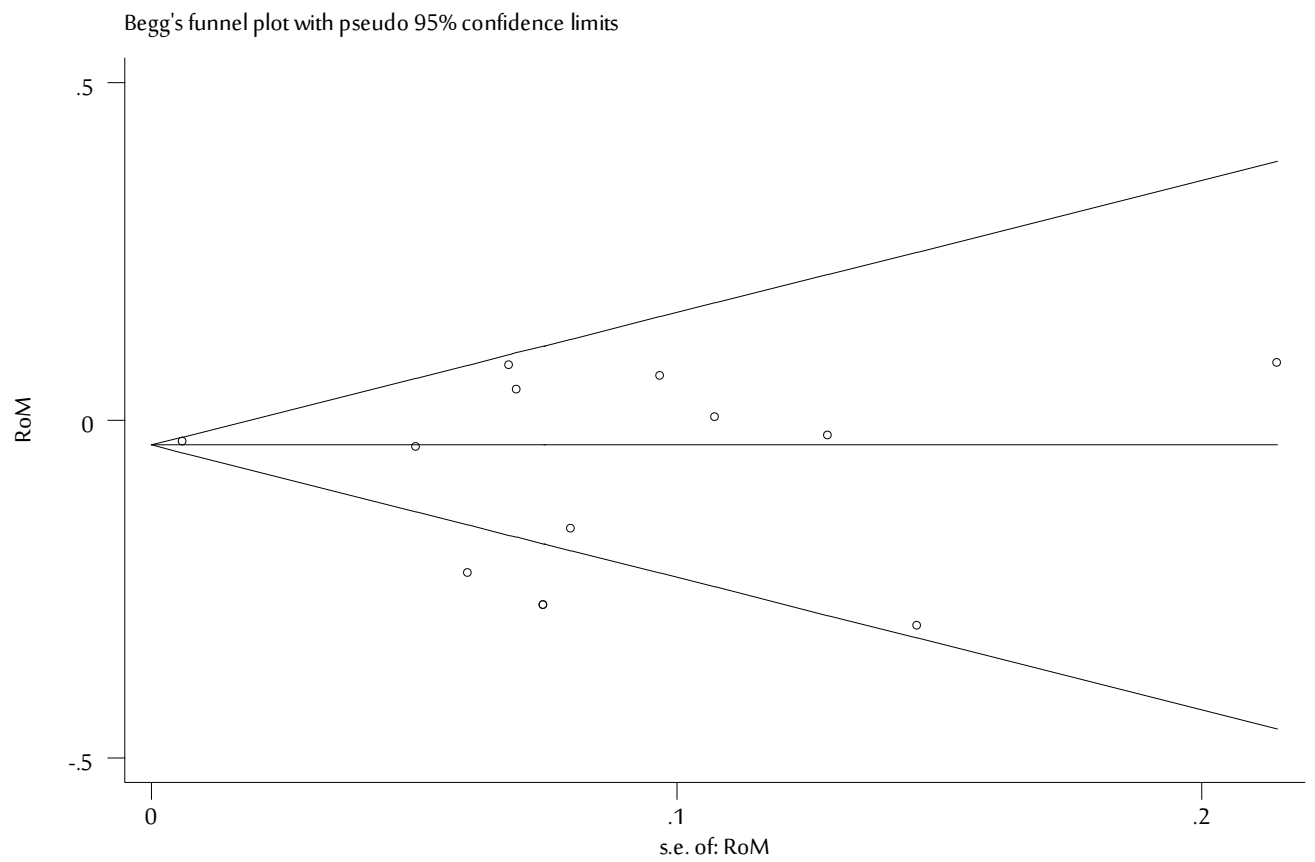

**Supplementary Figure S9.** Publication bias in studies of maternal red blood cell folate level in the NTDs-affected mothers compared with control mothers by Funnel plot.
